# Supplementary material for: Transcriptomic architecture of nuclei in the marmoset CNS
Source: PubMed Central journal article supplement (PMC9492672; doi:10.1038/s41467-022-33140-z), 2022-09-21
Supplement: 41467_2022_33140_MOESM3_ESM.pdf [file 41467_2022_33140_MOESM3_ESM.pdf]

## **Description of Additional Supplementary Files**

**Supplementary Data 1:** Sample metadata

**Supplementary Data 2:** Module Gene List

**Supplementary Data 3:** Ligand-Receptor-Target Gene List

**Supplementary Data 4:** Level 1, Level 2, Disease Gene List
