# Supplementary material for: Transcriptomic architecture of nuclei in the marmoset CNS
Source: PubMed Central journal article supplement (PMC9492672; doi:10.1038/s41467-022-33140-z), 2022-09-21
Supplement: 41467_2022_33140_MOESM8_ESM.pdf [file 41467_2022_33140_MOESM8_ESM.pdf]

## Reporting Summary

Nature Portfolio wishes to improve the reproducibility of the work that we publish. This form provides structure for consistency and transparency in reporting. For further information on Nature Portfolio policies, see our [Editorial Policies](#) and the [Editorial Policy Checklist](#).

### Statistics

For all statistical analyses, confirm that the following items are present in the figure legend, table legend, main text, or Methods section.

n/a Confirmed

- |                                     |                                     |                                                                                                                                                                                                                                                            |
|-------------------------------------|-------------------------------------|------------------------------------------------------------------------------------------------------------------------------------------------------------------------------------------------------------------------------------------------------------|
| <input type="checkbox"/>            | <input checked="" type="checkbox"/> | The exact sample size ( $n$ ) for each experimental group/condition, given as a discrete number and unit of measurement                                                                                                                                    |
| <input checked="" type="checkbox"/> | <input type="checkbox"/>            | A statement on whether measurements were taken from distinct samples or whether the same sample was measured repeatedly                                                                                                                                    |
| <input type="checkbox"/>            | <input checked="" type="checkbox"/> | The statistical test(s) used AND whether they are one- or two-sided<br><i>Only common tests should be described solely by name; describe more complex techniques in the Methods section.</i>                                                               |
| <input checked="" type="checkbox"/> | <input type="checkbox"/>            | A description of all covariates tested                                                                                                                                                                                                                     |
| <input type="checkbox"/>            | <input checked="" type="checkbox"/> | A description of any assumptions or corrections, such as tests of normality and adjustment for multiple comparisons                                                                                                                                        |
| <input type="checkbox"/>            | <input checked="" type="checkbox"/> | A full description of the statistical parameters including central tendency (e.g. means) or other basic estimates (e.g. regression coefficient) AND variation (e.g. standard deviation) or associated estimates of uncertainty (e.g. confidence intervals) |
| <input type="checkbox"/>            | <input checked="" type="checkbox"/> | For null hypothesis testing, the test statistic (e.g. $F$ , $t$ , $r$ ) with confidence intervals, effect sizes, degrees of freedom and $P$ value noted<br><i>Give <math>P</math> values as exact values whenever suitable.</i>                            |
| <input checked="" type="checkbox"/> | <input type="checkbox"/>            | For Bayesian analysis, information on the choice of priors and Markov chain Monte Carlo settings                                                                                                                                                           |
| <input checked="" type="checkbox"/> | <input type="checkbox"/>            | For hierarchical and complex designs, identification of the appropriate level for tests and full reporting of outcomes                                                                                                                                     |
| <input type="checkbox"/>            | <input checked="" type="checkbox"/> | Estimates of effect sizes (e.g. Cohen's $d$ , Pearson's $r$ ), indicating how they were calculated                                                                                                                                                         |

*Our web collection on [statistics for biologists](#) contains articles on many of the points above.*

### Software and code

Policy information about [availability of computer code](#)

Data collection

Data analysis

For manuscripts utilizing custom algorithms or software that are central to the research but not yet described in published literature, software must be made available to editors and reviewers. We strongly encourage code deposition in a community repository (e.g. GitHub). See the Nature Portfolio [guidelines for submitting code & software](#) for further information.

### Data

Policy information about [availability of data](#)

All manuscripts must include a [data availability statement](#). This statement should provide the following information, where applicable:

- Accession codes, unique identifiers, or web links for publicly available datasets
- A description of any restrictions on data availability
- For clinical datasets or third party data, please ensure that the statement adheres to our [policy](#)

Raw and processed datasets are submitted to Gene Expression Omnibus (GEO) under session GSE165578 [https://www.ncbi.nlm.nih.gov/geo/query/acc.cgi?acc=GSE165578]. Data can also be visualized at https://cjpca.ninds.nih.gov. Source data are provided with this paper. Databases and datasets used in the study are listed in the "Key resources table" also with the following accession codes and links: GSE121654 [https://www.ncbi.nlm.nih.gov/geo/query/acc.cgi?acc=GSE121654], GSE132166 [https://www.ncbi.nlm.nih.gov/geo/query/acc.cgi?acc=GSE132166], GSE75330 [https://www.ncbi.nlm.nih.gov/geo/query/acc.cgi?acc=GSE75330], SRP135960 [https://www.ncbi.nlm.nih.gov/sra/?term=SRP135960], GSE52564 [https://www.ncbi.nlm.nih.gov/geo/query/acc.cgi?acc=GSE52564], phs001836 [https://www.ncbi.nlm.nih.gov/projects/gap/cgi-bin/study.cgi?study\_id=phs001836.v1.p1], GSE97930 [https://www.ncbi.nlm.nih.gov/geo/query/acc.cgi?acc=GSE97930], GSE104525 [https://www.ncbi.nlm.nih.gov/geo/query/acc.cgi?acc=GSE104525], GSE73721 [https://www.ncbi.nlm.nih.gov/geo/query/acc.cgi?acc=GSE73721]

acc=GSE73721], GSE118257 [https://www.ncbi.nlm.nih.gov/geo/query/acc.cgi?acc=GSE118257], GSE180759 [https://www.ncbi.nlm.nih.gov/geo/query/acc.cgi?acc=GSE180759], Marmoset Gene Atlas [https://gene-atlas.brainminds.riken.jp/], Marmoset Brain Mapping [https://marmosetbrainmapping.org/].

## Field-specific reporting

Please select the one below that is the best fit for your research. If you are not sure, read the appropriate sections before making your selection.

Life sciences  Behavioural & social sciences  Ecological, evolutionary & environmental sciences

For a reference copy of the document with all sections, see [nature.com/documents/nr-reporting-summary-flat.pdf](https://www.nature.com/documents/nr-reporting-summary-flat.pdf)

## Life sciences study design

All studies must disclose on these points even when the disclosure is negative.

|                 |                                                                                                                                                                                                                                                                                                                                                                                                                                                                                                                                                                                                                                                                                                                                                                                                                                                                                                                                                                                                                                                                                                                                                                                                                                                                                                                                                                                                                                                                                       |
|-----------------|---------------------------------------------------------------------------------------------------------------------------------------------------------------------------------------------------------------------------------------------------------------------------------------------------------------------------------------------------------------------------------------------------------------------------------------------------------------------------------------------------------------------------------------------------------------------------------------------------------------------------------------------------------------------------------------------------------------------------------------------------------------------------------------------------------------------------------------------------------------------------------------------------------------------------------------------------------------------------------------------------------------------------------------------------------------------------------------------------------------------------------------------------------------------------------------------------------------------------------------------------------------------------------------------------------------------------------------------------------------------------------------------------------------------------------------------------------------------------------------|
| Sample size     | Our central nervous system marmoset cell atlas was generated from 2 healthy, 5.5-year-old common marmosets ( <i>Callithrix jacchus</i> ), one female (CJH01) and one male (CJR02). For each animal, 19 types of tissue were collected to generate single-nucleus suspension. A total of 42 sample preps were included in the final atlas, 22 samples from CJH01 and 20 samples from CJR02. See supplemental figure S2 for detail on how many nuclei were recovered per sample prep. Staining was done with 4 healthy 4–6-year-old marmosets, two females (CJaT01, CJaV02) and two males (CJaB03, CJaD04). We include 2 marmosets to abide by the “reduction” principle of “3Rs” in animal research but include both sexes to account for common biological diversity. There is a well-accepted, statistically justified rule-of-thumb of using at least 2 animals in nonhuman primate neuroscience studies (doi: <a href="https://doi.org/10.1101/2022.05.10.491373">https://doi.org/10.1101/2022.05.10.491373</a> ). Instead of considering the individual animal as an experimental entity, we aim to survey the transcriptome diversity of nuclei ( $n > 500,000$ ) across brain regions pooled from 2 animals, thereby yielding reasonable statistical power in our current design. We included 2 marmosets of both sexes for ethical, practical, and biological considerations. We found and annotated clusters that are comparable between animals to reach robust conclusions. |
| Data exclusions | Low quality reads, putative doublets, and low quality cells were excluded for each sample. See detail standards and parameters in “Preprocessing and quality control” paragraph in the Materials and Methods section.                                                                                                                                                                                                                                                                                                                                                                                                                                                                                                                                                                                                                                                                                                                                                                                                                                                                                                                                                                                                                                                                                                                                                                                                                                                                 |
| Replication     | Instead of considering the individual animal as an experimental entity, we aim to survey the transcriptome diversity of nuclei ( $n > 500,000$ ) across brain regions pooled from 2 animals, thereby yielding reasonable statistical power in our current design.                                                                                                                                                                                                                                                                                                                                                                                                                                                                                                                                                                                                                                                                                                                                                                                                                                                                                                                                                                                                                                                                                                                                                                                                                     |
| Randomization   | We performed observational study instead of controlled experiment, therefore randomization and blinding are not applicable to the study.                                                                                                                                                                                                                                                                                                                                                                                                                                                                                                                                                                                                                                                                                                                                                                                                                                                                                                                                                                                                                                                                                                                                                                                                                                                                                                                                              |
| Blinding        | We performed observational study instead of controlled experiment, therefore randomization and blinding are not applicable to the study.                                                                                                                                                                                                                                                                                                                                                                                                                                                                                                                                                                                                                                                                                                                                                                                                                                                                                                                                                                                                                                                                                                                                                                                                                                                                                                                                              |

## Reporting for specific materials, systems and methods

We require information from authors about some types of materials, experimental systems and methods used in many studies. Here, indicate whether each material, system or method listed is relevant to your study. If you are not sure if a list item applies to your research, read the appropriate section before selecting a response.

### Materials & experimental systems

| n/a                                 | Involved in the study                                           |
|-------------------------------------|-----------------------------------------------------------------|
| <input type="checkbox"/>            | <input checked="" type="checkbox"/> Antibodies                  |
| <input checked="" type="checkbox"/> | <input type="checkbox"/> Eukaryotic cell lines                  |
| <input checked="" type="checkbox"/> | <input type="checkbox"/> Palaeontology and archaeology          |
| <input type="checkbox"/>            | <input checked="" type="checkbox"/> Animals and other organisms |
| <input checked="" type="checkbox"/> | <input type="checkbox"/> Human research participants            |
| <input checked="" type="checkbox"/> | <input type="checkbox"/> Clinical data                          |
| <input checked="" type="checkbox"/> | <input type="checkbox"/> Dual use research of concern           |

### Methods

| n/a                                 | Involved in the study                                      |
|-------------------------------------|------------------------------------------------------------|
| <input checked="" type="checkbox"/> | <input type="checkbox"/> ChIP-seq                          |
| <input checked="" type="checkbox"/> | <input type="checkbox"/> Flow cytometry                    |
| <input type="checkbox"/>            | <input checked="" type="checkbox"/> MRI-based neuroimaging |

## Antibodies

|                 |                                                                                                                                                                                                                                                                                                                                                                                                                                                                                                                                                                                                                                                                                                |
|-----------------|------------------------------------------------------------------------------------------------------------------------------------------------------------------------------------------------------------------------------------------------------------------------------------------------------------------------------------------------------------------------------------------------------------------------------------------------------------------------------------------------------------------------------------------------------------------------------------------------------------------------------------------------------------------------------------------------|
| Antibodies used | The following antibodies were used: mouse anti-PLP (Bio-Rad, MCA839G, 1:200), rabbit anti-IBA1 (Wako, 019-19741, 1:200), mouse anti-IBA1 (Sigma, SAB2702364, 1:100), rabbit anti-SLC15A1 (Sigma, HPA002827, 1:100), rabbit anti-OLIG2 (Chemicon®, AB9610, 1:200), rabbit anti-GFAP (Dako, Z033429-2, 1:200), PV Poly-HRP Anti-Rabbit IgG (Leica, PV6119, 1:1), PV Poly-HRP Anti-Mouse IgG (Leica, PV6114, 1:1), ImmPRESS®-AP Horse Anti-Rabbit IgG Polymer (Vector, MP-5401-50, 1:1), ImmPRESS®-AP Horse Anti-Mouse IgG Polymer (Vector, MP-5402-50, 1:1), Goat anti-Rabbit IgG (H+L) Cross-Adsorbed Secondary Antibody, Alexa Fluor 594 (Invitrogen, A-11012, 1:400).                         |
| Validation      | links to reference and citation<br>Bio-Rad, MCA839G: <a href="https://www.bio-rad-antibodies.com/monoclonal/cow-bovine-myelin-proteolipid-protein-antibody-plpc1-mca839.html?f=purified#references">https://www.bio-rad-antibodies.com/monoclonal/cow-bovine-myelin-proteolipid-protein-antibody-plpc1-mca839.html?f=purified#references</a><br>Wako, 019-19741: <a href="https://labchem-wako.fujifilm.com/us/product_data/docs/00055446_doc03.pdf">https://labchem-wako.fujifilm.com/us/product_data/docs/00055446_doc03.pdf</a><br>Sigma, SAB2702364: <a href="https://www.sigmaaldrich.com/US/en/product/sigma/sab2702364">https://www.sigmaaldrich.com/US/en/product/sigma/sab2702364</a> |

Sigma, HPA002827: <https://www.sigmaaldrich.com/US/en/product/sigma/hpa002827>  
 Chemicon, AB9610: [https://www.emdmillipore.com/US/en/product/Anti-Olig-2-Antibody,MM\\_NF-AB9610](https://www.emdmillipore.com/US/en/product/Anti-Olig-2-Antibody,MM_NF-AB9610)  
 Dako, Z033429-2: [https://www.agilent.com/en/product/immunohistochemistry/antibodies-controls/primary-antibodies/glia-fibrillary-acidic-protein-\(concentrate\)-76683](https://www.agilent.com/en/product/immunohistochemistry/antibodies-controls/primary-antibodies/glia-fibrillary-acidic-protein-(concentrate)-76683)  
 Leica, PV6119: <https://shop.leicabiosystems.com/us/ihc-ish/detection-systems/pid-powervision-poly-hrp-anti-rabbit-ihc-detection-systems>  
 Leica, PV6114: <https://shop.leicabiosystems.com/us/ihc-ish/detection-systems/pid-powervision-poly-hrp-anti-rabbit-ihc-detection-systems>  
 Vector, MP-5401-50: <https://vectorlabs.com/products/enzyme-polymer/impress-anti-rabbit-igg-ap-kit>  
 Vector, MP-5402-50: <https://vectorlabs.com/products/enzyme-polymer/impress-anti-mouse-igg-ap-kit>  
 Thermo, A-11012: <https://www.thermofisher.com/antibody/product/Goat-anti-Rabbit-IgG-H-L-Cross-Adsorbed-Secondary-Antibody-Polyclonal/A-11012>

## Animals and other organisms

Policy information about [studies involving animals](#); [ARRIVE guidelines](#) recommended for reporting animal research

|                         |                                                                                                                        |
|-------------------------|------------------------------------------------------------------------------------------------------------------------|
| Laboratory animals      | Two common marmosets ( <i>Callithrix jacchus</i> ), 5.5 years old, both sexes                                          |
| Wild animals            | No Wild animals were used in this study                                                                                |
| Field-collected samples | No field-collected samples were used in this study                                                                     |
| Ethics oversight        | All marmosets were housed and handled with the approval of the NINDS/NIDCD/NCCIH Animal Care and Use Committee (ACUC). |

Note that full information on the approval of the study protocol must also be provided in the manuscript.

## Magnetic resonance imaging

### Experimental design

|                                 |     |
|---------------------------------|-----|
| Design type                     | N/A |
| Design specifications           | N/A |
| Behavioral performance measures | N/A |

### Acquisition

|                               |                                                                                                                                                                                                                                                                                                               |
|-------------------------------|---------------------------------------------------------------------------------------------------------------------------------------------------------------------------------------------------------------------------------------------------------------------------------------------------------------|
| Imaging type(s)               | structural                                                                                                                                                                                                                                                                                                    |
| Field strength                | 7                                                                                                                                                                                                                                                                                                             |
| Sequence & imaging parameters | MRI was performed on a 7-tesla Bruker system to generate a series of proton density-weighted images with a resolution of 0.15 x 0.15 x 1 mm <sup>3</sup> per voxel and a matrix of 213 x 160 x 36 per session (Sati et al., 2012). The images were used for volume reconstruction and anatomy identification. |
| Area of acquisition           | whole brain                                                                                                                                                                                                                                                                                                   |
| Diffusion MRI                 | <input type="checkbox"/> Used <input checked="" type="checkbox"/> Not used                                                                                                                                                                                                                                    |

### Preprocessing

|                            |     |
|----------------------------|-----|
| Preprocessing software     | N/A |
| Normalization              | N/A |
| Normalization template     | N/A |
| Noise and artifact removal | N/A |
| Volume censoring           | N/A |

### Statistical modeling & inference

|                           |                                                                                                                  |
|---------------------------|------------------------------------------------------------------------------------------------------------------|
| Model type and settings   | N/A                                                                                                              |
| Effect(s) tested          | N/A                                                                                                              |
| Specify type of analysis: | <input type="checkbox"/> Whole brain <input checked="" type="checkbox"/> ROI-based <input type="checkbox"/> Both |

|                                                                           |                                                                                                    |
|---------------------------------------------------------------------------|----------------------------------------------------------------------------------------------------|
| Anatomical location(s)                                                    | Marmoset Gene Atlas (Shimogori et al., 2018)<br>adult marmoset MRI atlas (Liu et al., 2018a; 2020) |
| Statistic type for inference<br>(See <a href="#">Eklund et al. 2016</a> ) | N/A                                                                                                |
| Correction                                                                | N/A                                                                                                |

## Models & analysis

|                                     |                                                                       |
|-------------------------------------|-----------------------------------------------------------------------|
| n/a                                 | Involvement in the study                                              |
| <input checked="" type="checkbox"/> | <input type="checkbox"/> Functional and/or effective connectivity     |
| <input checked="" type="checkbox"/> | <input type="checkbox"/> Graph analysis                               |
| <input checked="" type="checkbox"/> | <input type="checkbox"/> Multivariate modeling or predictive analysis |
